# Supplementary material for: Inhibitory effects of Atlantic cod (Gadus morhua) peptides on RANKL-induced osteoclastogenesis in vitro and osteoporosis in ovariectomized mice
Source: Royal Society of Chemistry journal article supplement (doi:10.1039/d1fo03696c), 2022-01-01

**Inhibitory effects of Atlantic cod (*Gadus morhua*) peptides on  
RANKL-induced osteoclastogenesis in vitro and osteoporosis in  
ovariectomized mice**

Meilian Yang<sup>a</sup>, Di Wu<sup>a</sup>, Shuzhen Cheng<sup>a,b</sup>, Yu Dong<sup>c</sup>, Chao Wu<sup>a</sup>, Zhenyu Wang<sup>a</sup>,

Ming Du<sup>a,\*</sup>

<sup>a</sup> School of Food Science and Technology, Collaborative Innovation Center of Seafood Deep Processing, National Engineering Research Center of Seafood, Dalian Polytechnic University, Dalian 116034, China.

<sup>b</sup> Beijing Advanced Innovation Center for Food Nutrition and Human Health, College of Food Science and Nutritional Engineering, China Agricultural University, Beijing 100083, China;

<sup>c</sup> Dalian Feide Biological Industry Co., Ltd. Dalian 116085, China.

\* Corresponding Authors: Prof. Ming Du (E-mail: [duming@dlpu.edu.cn](mailto:duming@dlpu.edu.cn);

Fax: +86-411-86323262; Tel: +86-411-86332275)

**Raw images of Western blot data**  
**Figure S1**

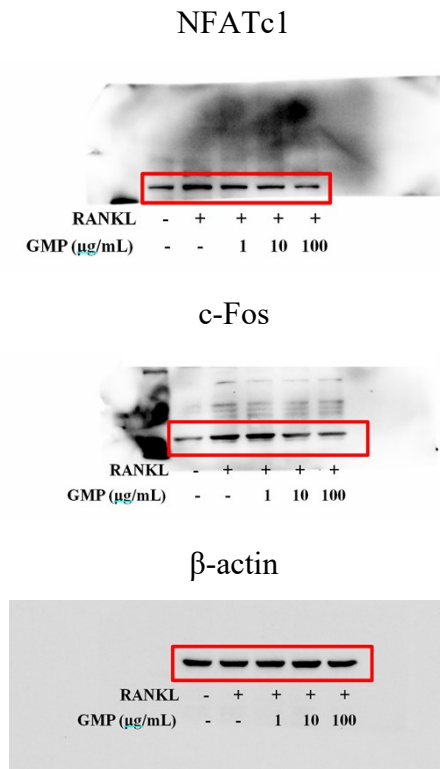

**Figure S2**

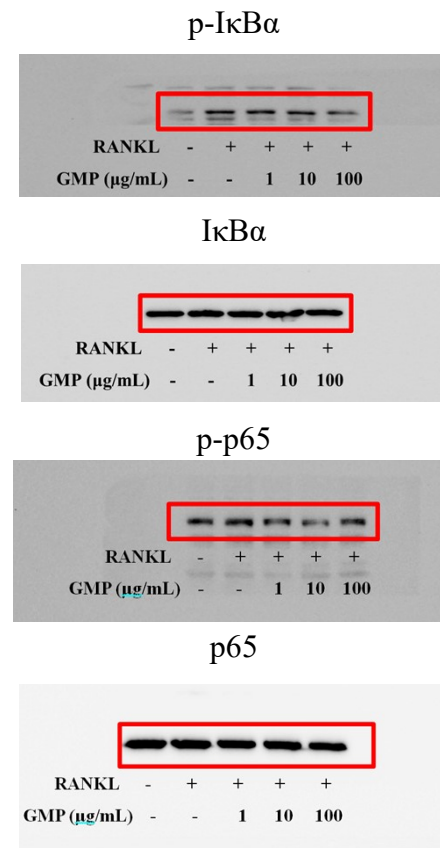

Figure S3

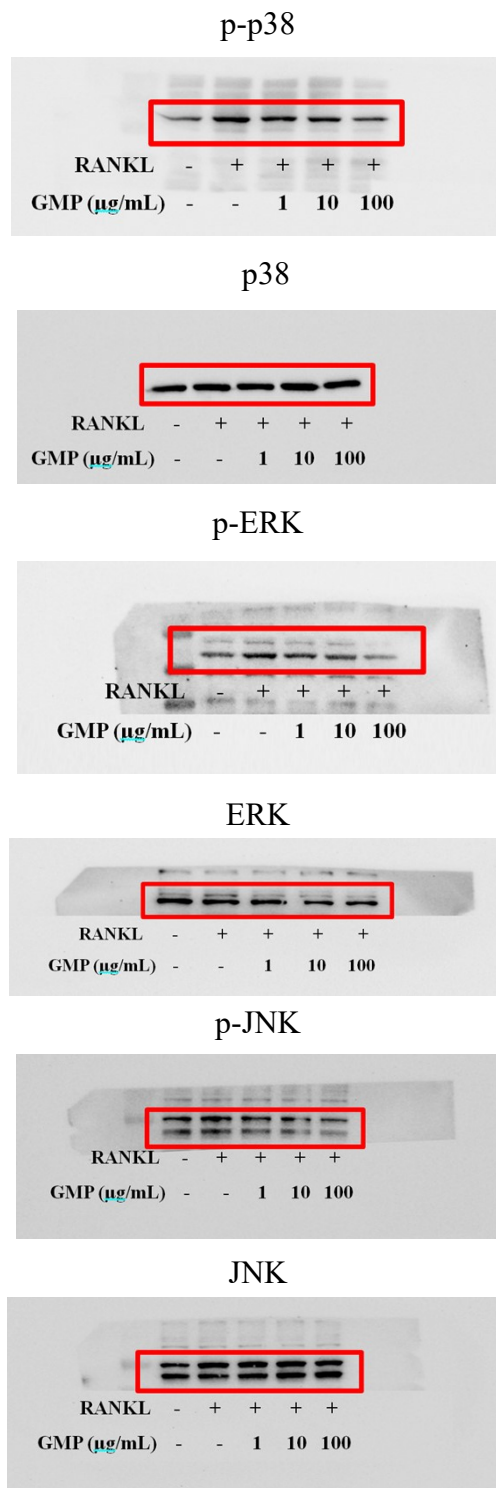

Supplement: d1fo03696c1.pdf [file d1fo03696c1.pdf]
